# Supplementary material for: On the superhydrophobic properties of nickel nanocarpets
Source: Royal Society of Chemistry journal article supplement (doi:10.1039/b909899b), 2009-01-01
Supplement: b909899b.pdf [file b909899b.pdf]

**On The superhydrophobic properties of nickel nanocarpet**

Chiara Neto, Kyle R. Joseph and William R. Brant

Supplementary Information

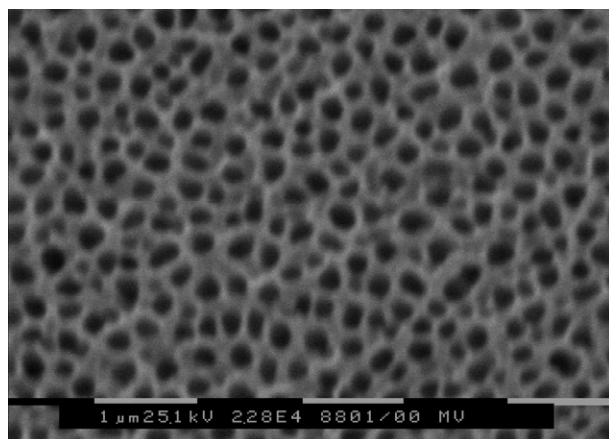

**Figure S1** SEM micrograph of the Anodisc alumina membrane surface employed as a template.

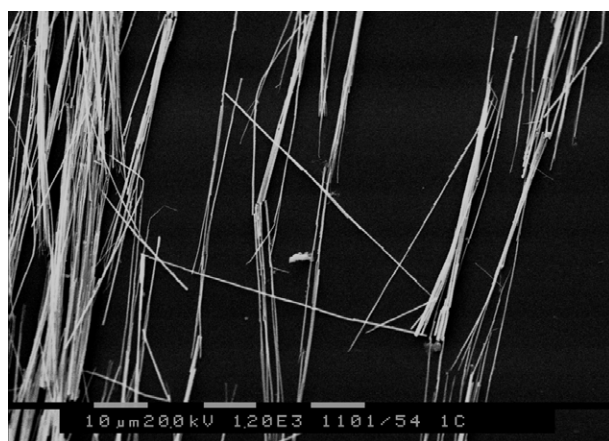

**Figure S2** SEM micrograph of the nickel nanowires electrodeposited for 50 minutes and then detached from the Anodisc membrane and metal backing. The average length of the nanowires is  $50 \pm 3 \mu\text{m}$  and the average diameter is  $200 \pm 20 \text{ nm}$ .

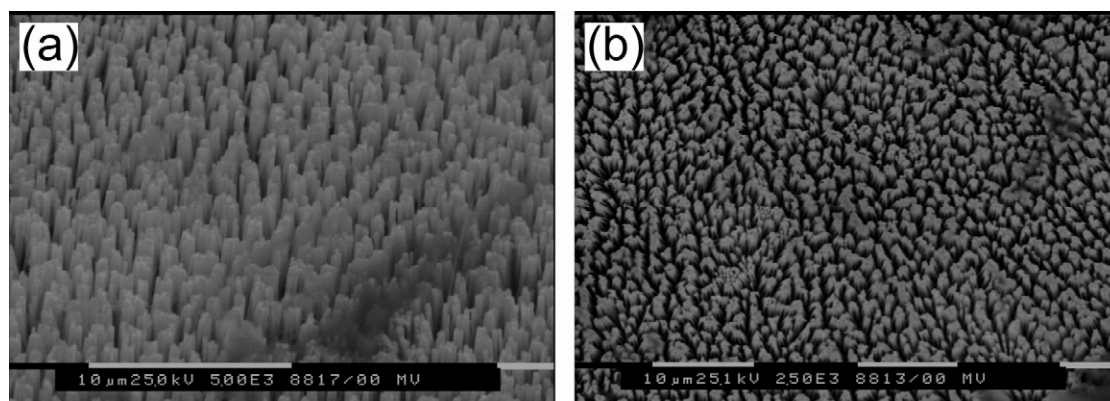

**Figure S3** SEM micrographs showing different samples of nickel nanocarpets 5  $\mu\text{m}$  long prepared on gold backing.

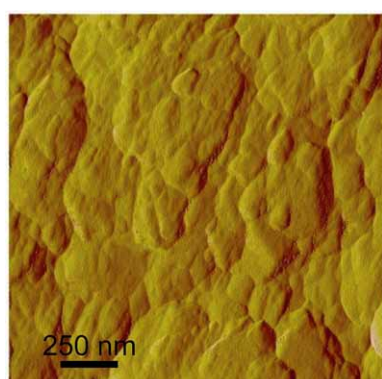

**Figure S4** AFM amplitude image of a “flat” nickel surface prepared by electrodepositing nickel directly onto a flat copper plate for 15 minutes.

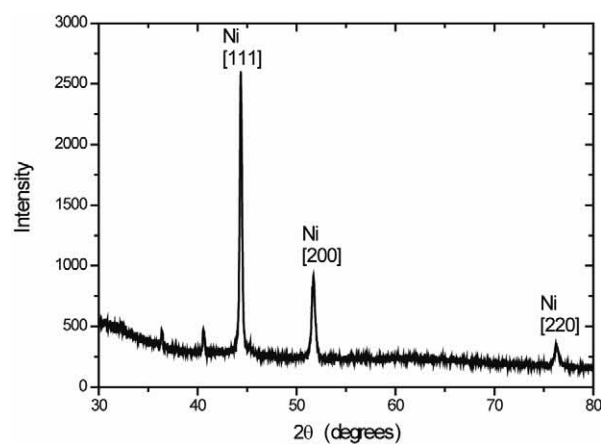

**Figure S5** X ray diffraction patterns of nickel nanowires. A droplet of a nanowire suspension in chloroform was deposited on a glass slide and dried. The data were obtained using a Shimadzu XRD 6000 powder X-ray diffractometer with Cu K- $\alpha$  radiation, a tube voltage of 40 kV, and a tube current of 20 mA, at a rate of 1 degree/min, and step size of 0.02 degrees.

Electronic Supplementary Material for PCCP  
This Journal is © The Owner Societies 2009

The intensity and position of the three nickel peaks match the literature values (e.g. Mazza, Masini, *Philos. Mag.*, 1929, 7, 301).
